# Supplementary material for: On the “yl” bond weakening in uranyl(VI) coordination complexes
Source: Royal Society of Chemistry journal article supplement (doi:10.1039/c1dt10481k), 2011-01-01

## Electronic Supporting Information

Fig. S1 Molecular orbitals of  $\text{UO}_2\text{Cl}^+(\text{aq})$

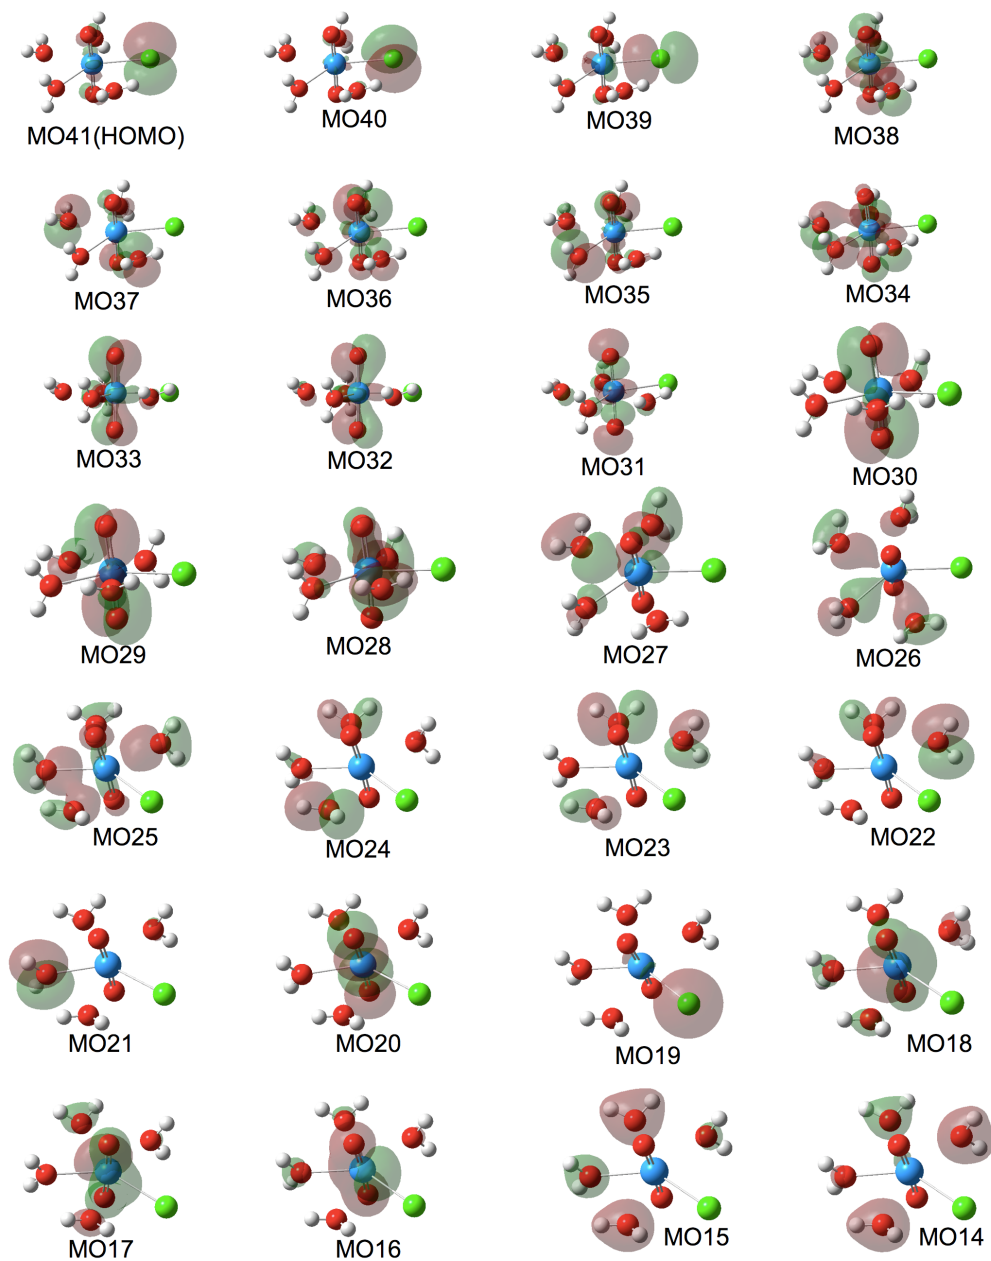

Fig. S2 Molecular orbitals of  $\text{UO}_2\text{F}^+(\text{aq})$

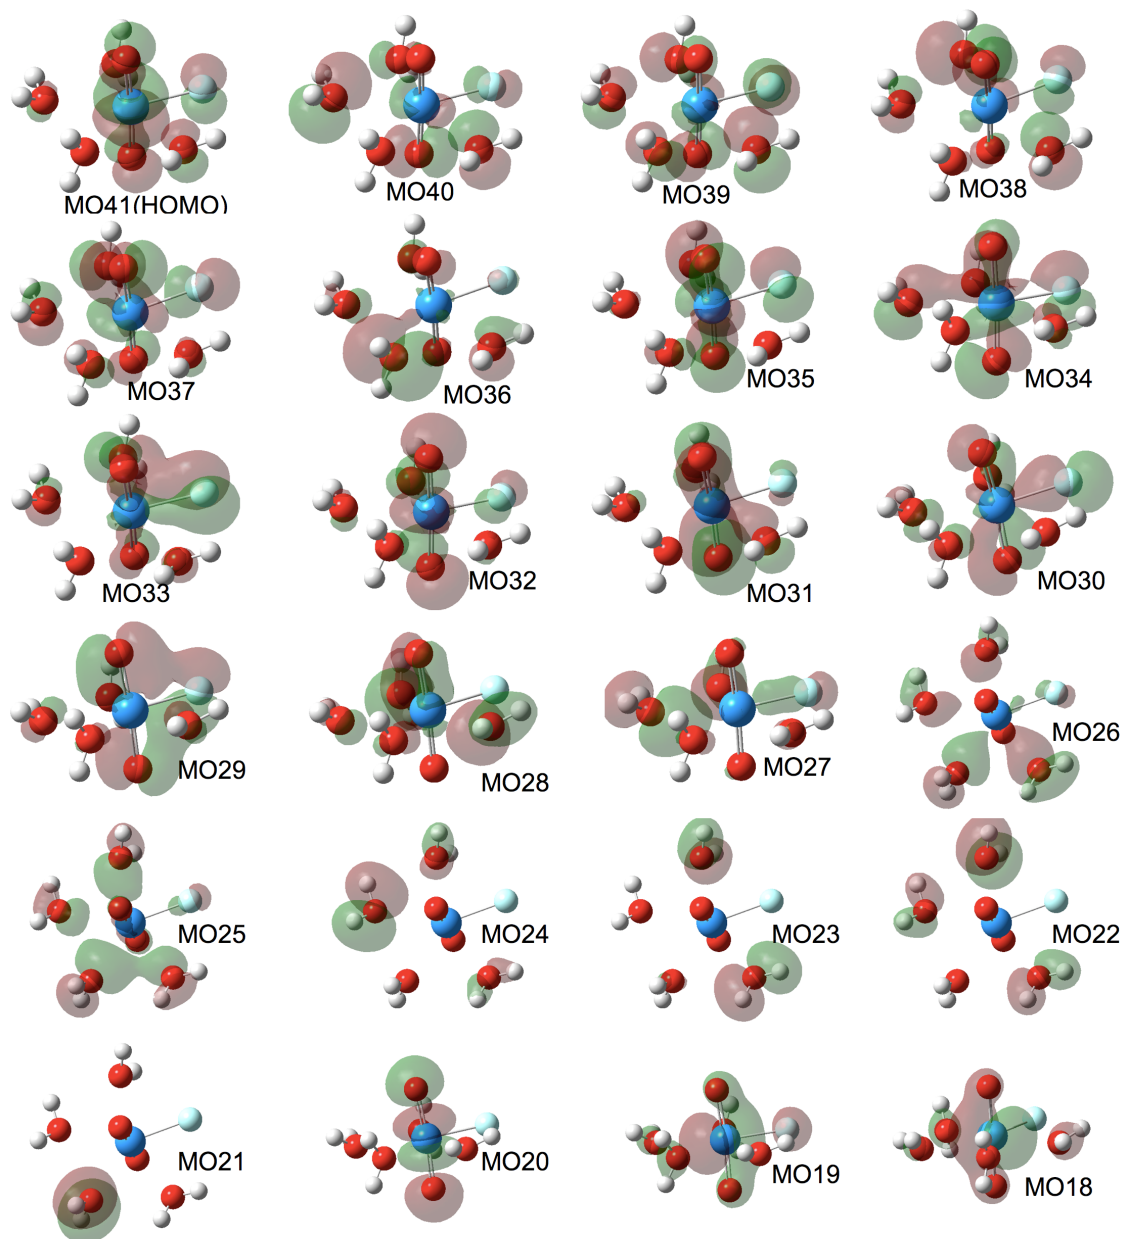

Fig.S3 Molecular orbitals of  $\text{UO}_2\text{OH}^+(\text{aq})$

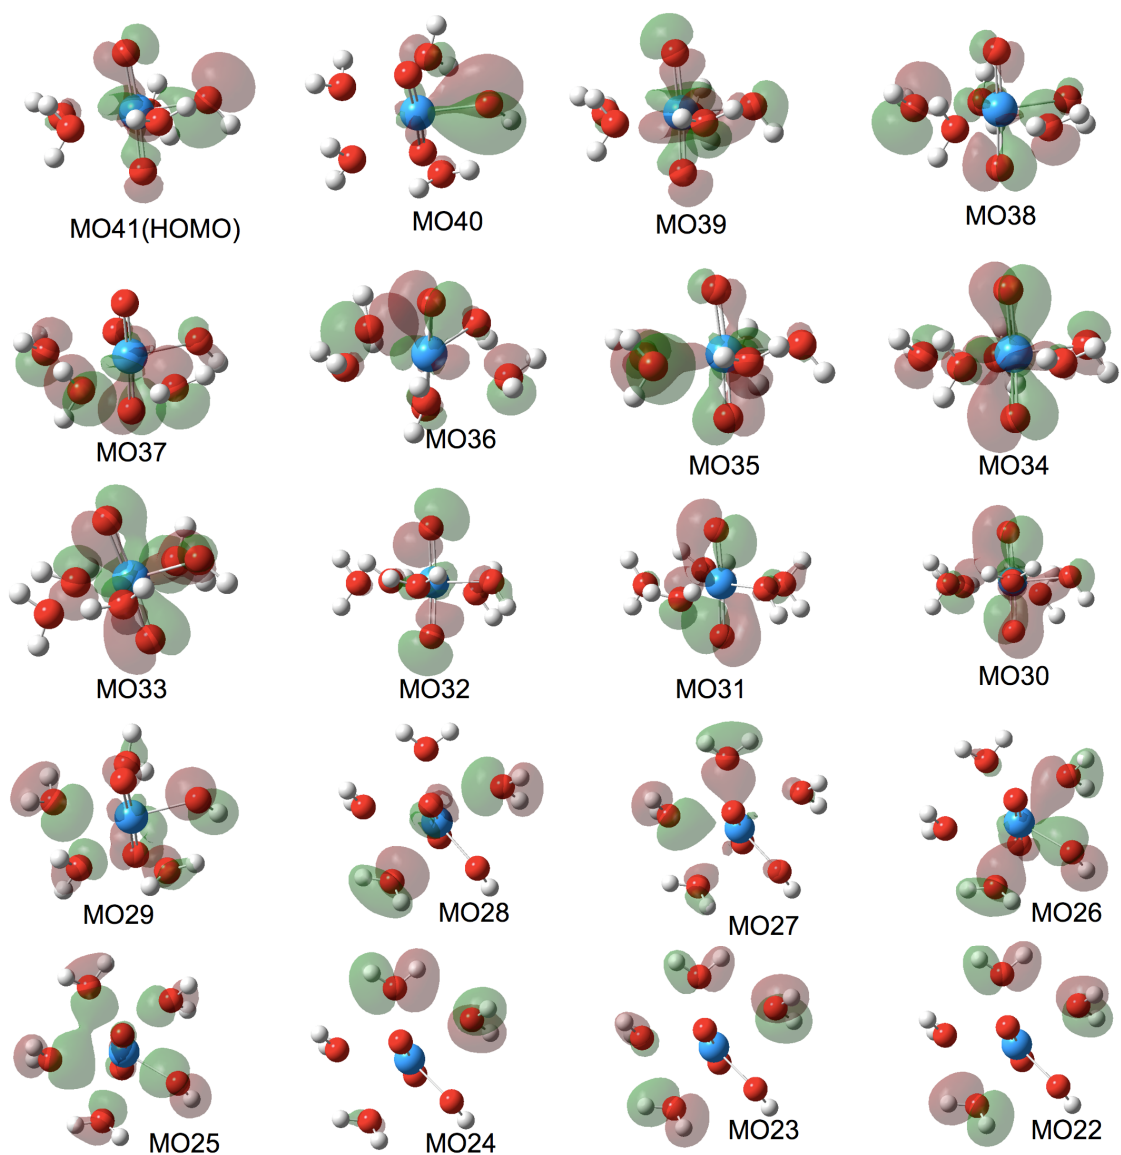

Supplement: c1dt10481k.pdf [file c1dt10481k.pdf]
